# Supplementary material
Source: PubMed Central journal article supplement (PMC5361555)
Supplement: SD13.pdf [file SD13.pdf]

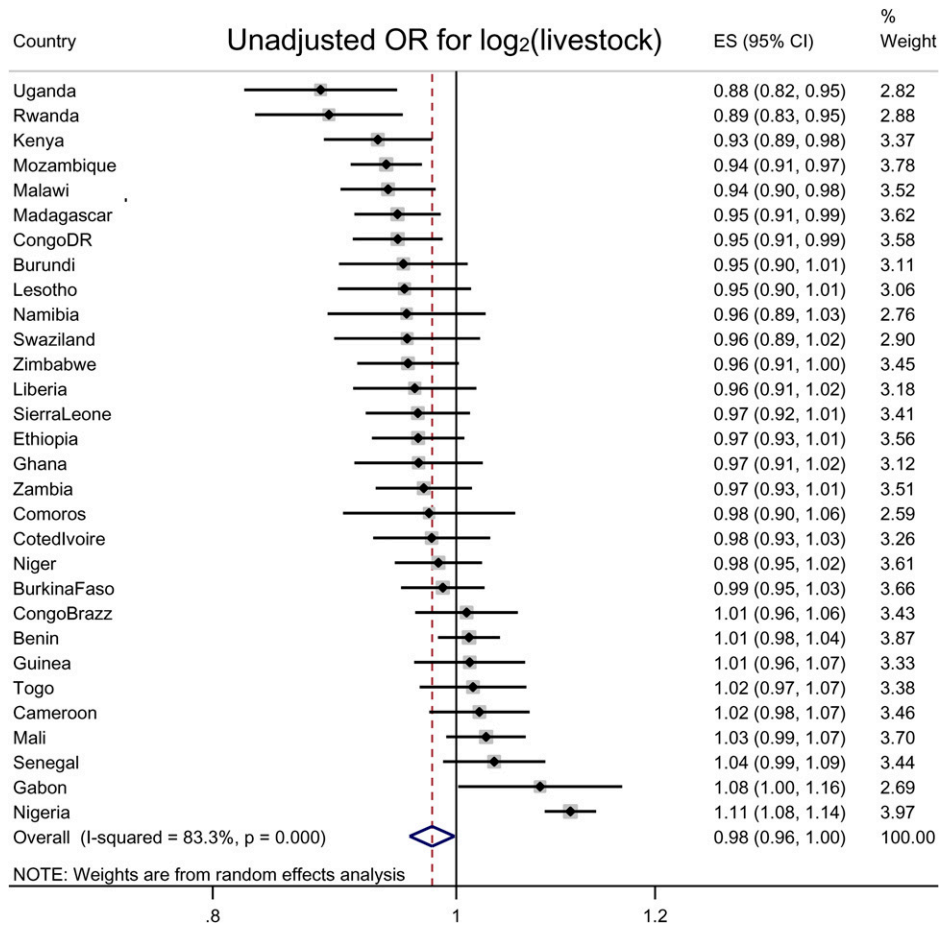

SUPPLEMENTAL FIGURE 1. Unadjusted odds ratio for stunting associated with a log<sub>2</sub> increase in animal ownership.

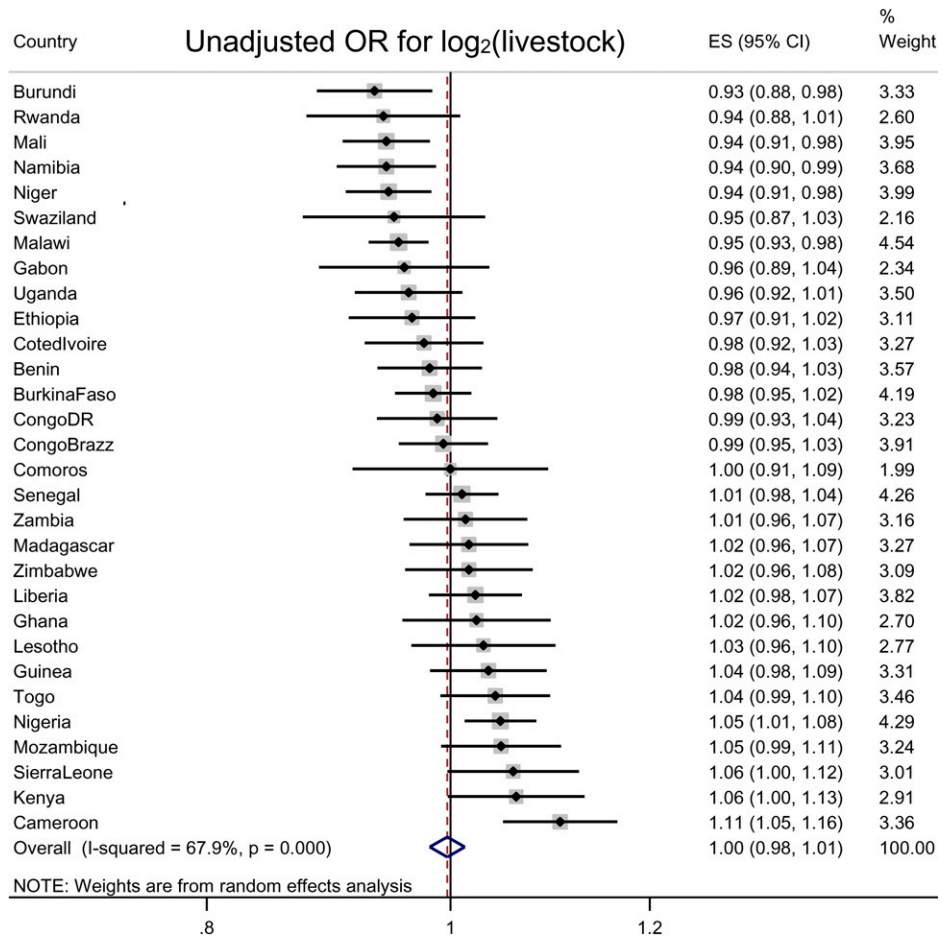

SUPPLEMENTAL FIGURE 2. Unadjusted odds ratio for diarrhea associated with a  $\log_2$  increase in animal ownership.

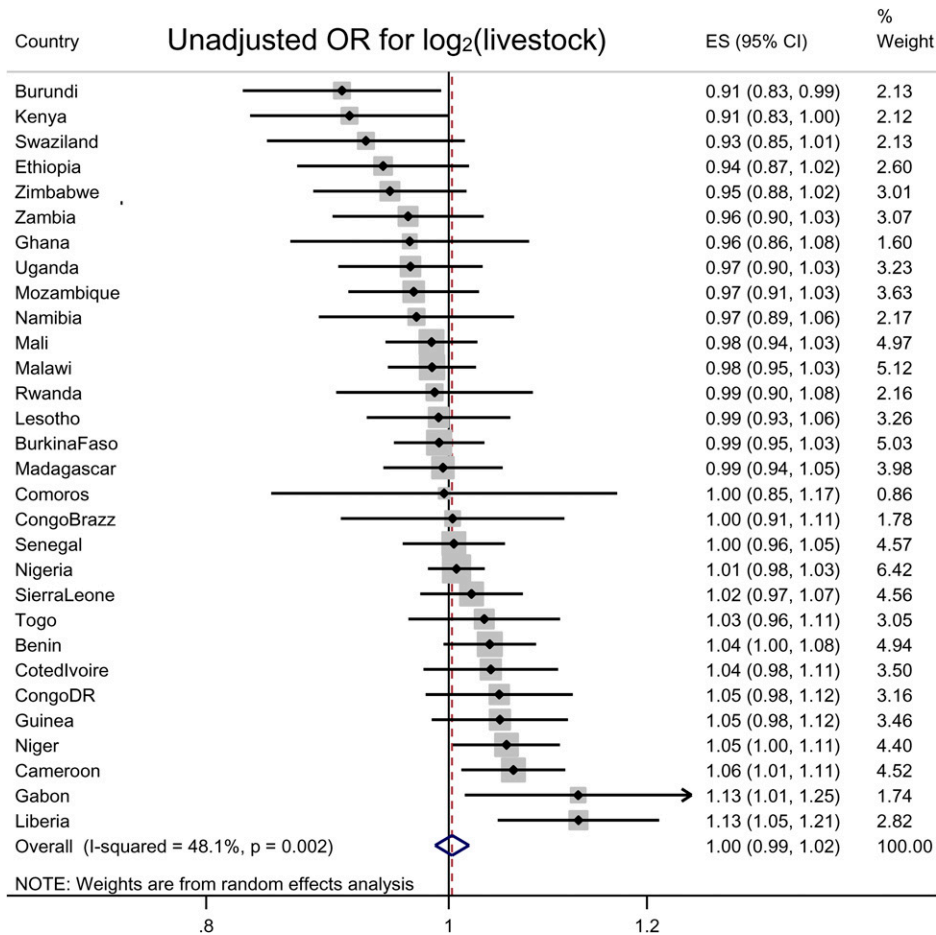

SUPPLEMENTAL FIGURE 3. Unadjusted odds ratio for mortality associated with a  $\log_2$  increase in animal ownership.

**A** Unadjusted OR's for stunting associated with chickens

**B** Adjusted OR's for stunting associated with chickens

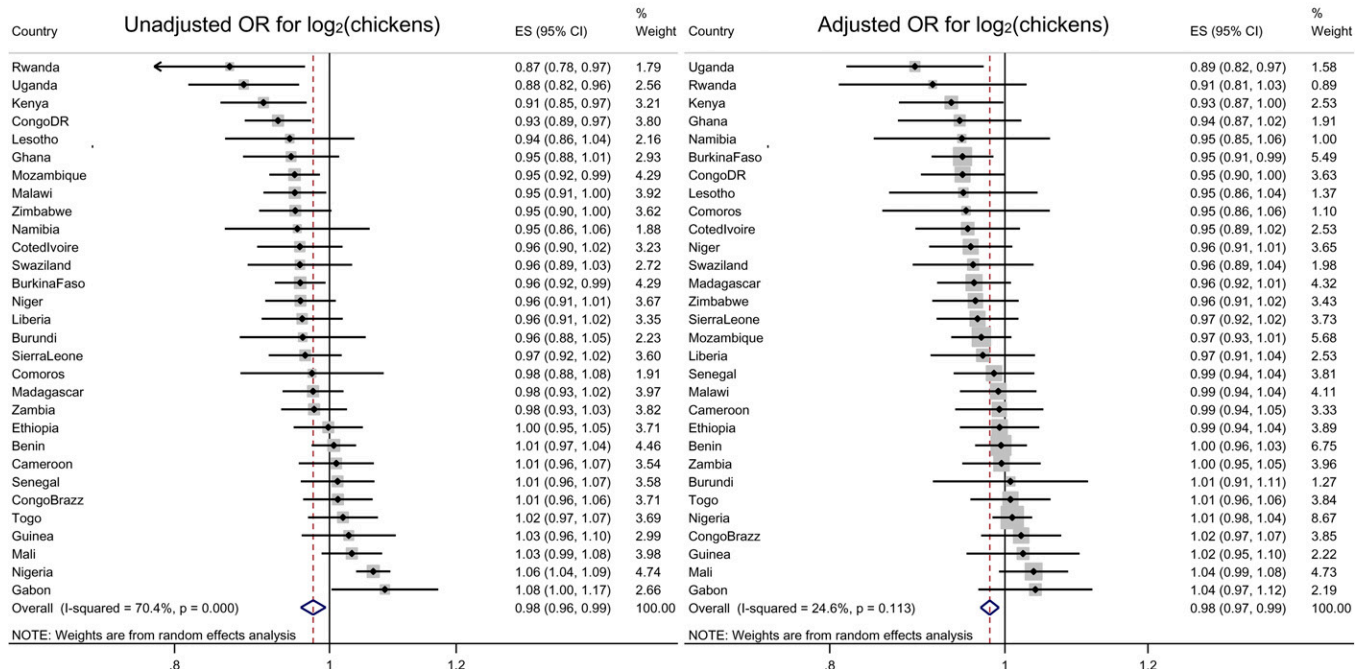

SUPPLEMENTAL FIGURE 4. (A) Unadjusted odds ratios (ORs) for stunting associated with a  $\log_2$  increase in chickens. (B) Adjusted ORs for stunting associated with a  $\log_2$  increase in chickens.

**A** Unadjusted OR's for diarrhea associated with chickens

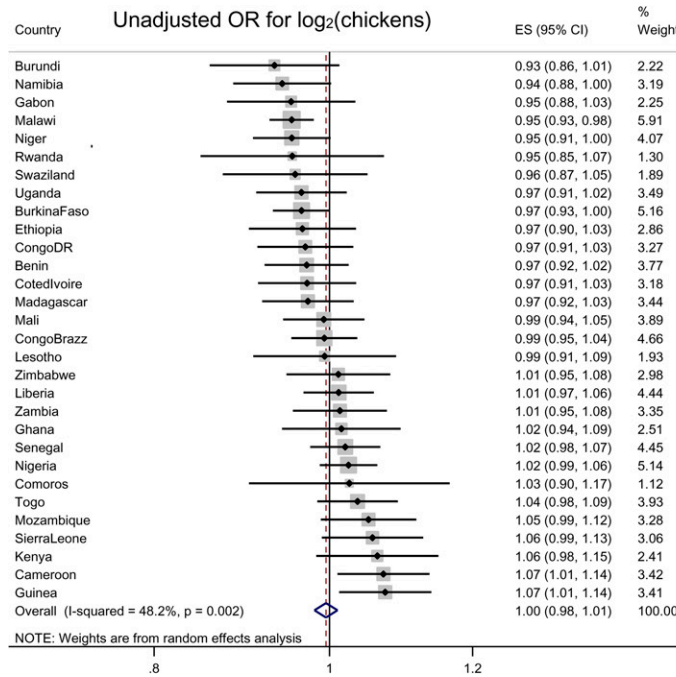

**B** Adjusted OR's for diarrhea associated with chickens

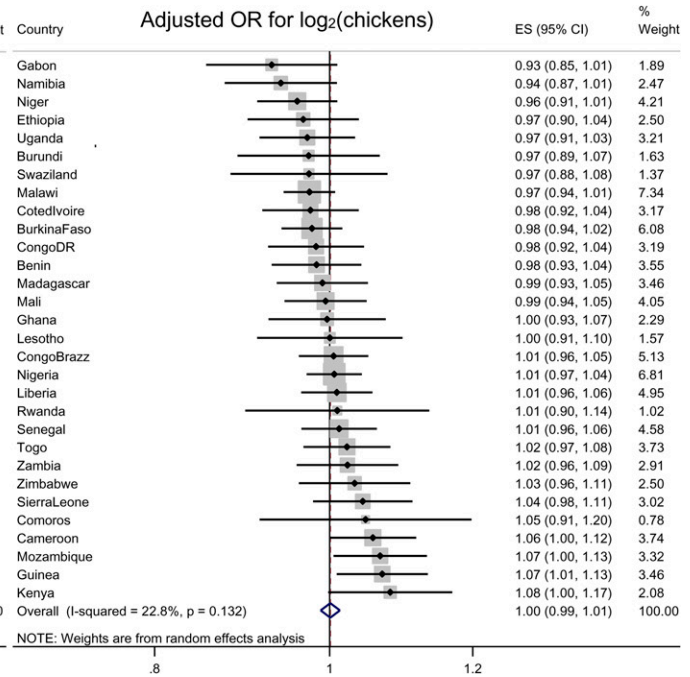

SUPPLEMENTAL FIGURE 5. (A) Unadjusted odds ratios (ORs) for diarrhea associated with a log<sub>2</sub> increase in chickens. (B) Adjusted ORs for diarrhea associated with a log<sub>2</sub> increase in chickens.

**A** Unadjusted OR's for mortality associated with chickens

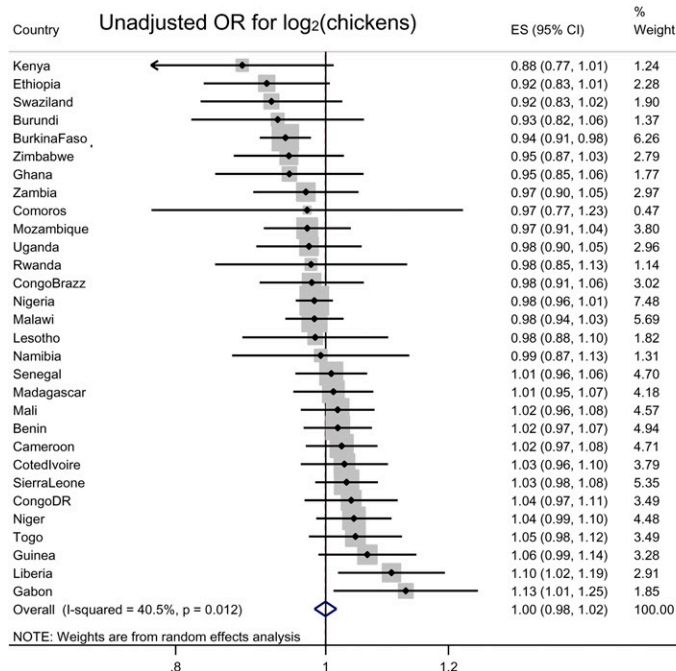

**B** Adjusted OR's for mortality associated with chickens

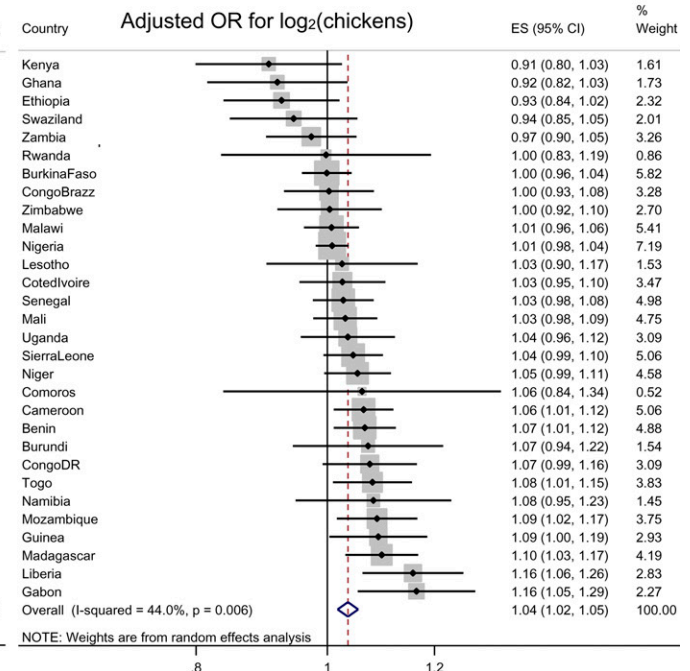

SUPPLEMENTAL FIGURE 6. (A) Unadjusted odds ratios (ORs) for mortality associated with a log<sub>2</sub> increase in chickens. (B) Adjusted ORs for mortality associated with a log<sub>2</sub> increase in chickens.
